# Supplementary material for: Preventing Staphylococcus aureus Sepsis through the Inhibition of Its Agglutination in Blood
Source: PLOS journal article supplement (doi:10.1371/journal.ppat.1002307), 2011-10-20
Supplement: S1 (10.1371/journal.ppat.1002307.s001) [file journal.ppat.1002307.s001.pdf › journal.ppat.1002307.s001.pdf]

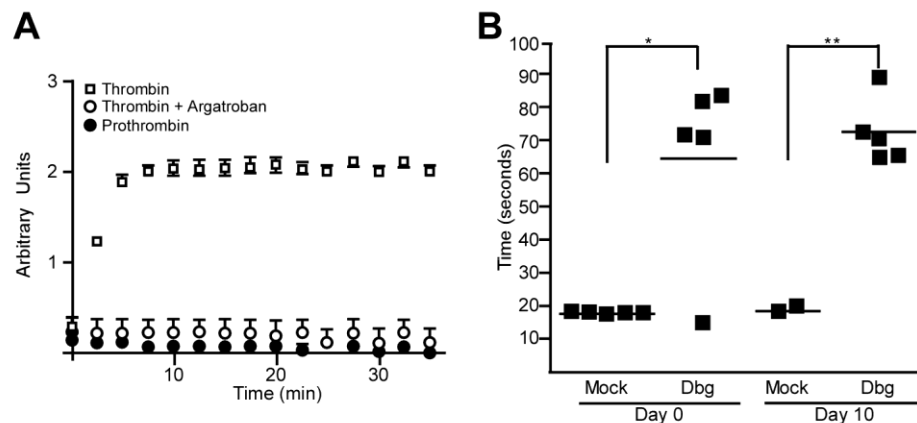

**Figure S1. Direct thrombin inhibitors and their effect on *in vitro* and *in vivo* coagulation.** (A) Conversion of fibrinogen to fibrin by human alpha-thrombin was measured in the presence or absence of 200 ng argatroban. Human prothrombin was incubated alone as negative control. One arbitrary unit is defined as  $A_{450} \times 100$ . Error bars represent standard deviation of triplicate experiments. (B) Dilute thrombin time was measured for plasma from mice treated with saline (mock) or Dabigatran-etexilate (Dbg) on the day of infection or on day 10 following infection. Each symbol represents a blood sample from a single mouse. Horizontal lines indicate mean thrombin time for the cohort. Statistical significance was determined by two-tailed Student's *t*-test: \* $P < 0.01$ , \*\* $P < 0.001$ .
